# Supplementary material
Source: ML conference proceedings conference paper supplement (https://www.ecva.net/papers/eccv_2022/papers_ECCV/html/136710189_ECCV_2022_paper.php)
Supplement: Supplementary file 1 [file 136710189-supp.pdf]

# Streaming Multiscale Deep Equilibrium Models

Can Ufuk Ertlenli, Emre Akbas, and Ramazan Gokberk Cinbis

Middle East Technical University (METU), Department of Computer Engineering  
{ufuk.ertlenli,eakbas,gcinbis}@metu.edu.tr

## 1 Supplementary Material

**Effect of shot changes.** In this section, we show the shot change experiment where the connected clips are both from the Cityscapes dataset. This can be considered as a more simple version of the experiment explained in the main paper since, in this case, the context of the clips are more similar and therefore, the representations of two different video frames are likely to be more similar compared to the cross-dataset experiments. We demonstrate the results of this experiment in Figure S1. We notice that, for shot changes in similar contexts, *i.e.* Cityscapes-to-Cityscapes, the mIoU scores on initial frames are higher than our previous experiment in Figure 5 (right) and also higher than the ImageNet-VID to Cityscapes shot change scenario in Figure 7 in the main paper. Additionally, after the first few frames, the mIoU scores again get close to the values presented in Figure 5 (right) and Figure 7 in the main paper. Overall the results confirm that StreamDEQ is able to adapt the representation to sudden changes in the video.

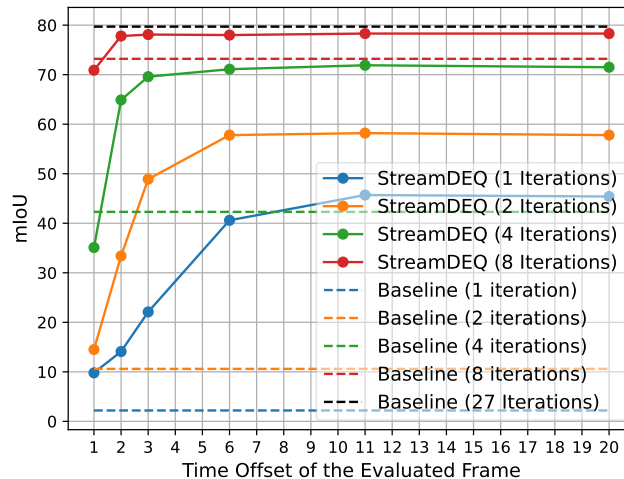

Fig. S1. mIoU results of StreamDEQ with shot changes from Cityscapes
